# Supplementary material for: Estimation of the Botanical Composition of Clover-Grass Leys from RGB Images Using Data Simulation and Fully Convolutional Neural Networks
Source: PubMed Central journal article supplement (PMC5751073; doi:10.3390/s17122930), 2017-12-17
Supplement: sensors-17-02930-s001.pdf [file sensors-17-02930-s001.pdf]

# Supplementary Materials: Estimation of the Botanical Composition of Clover-Grass Leys from RGB Images Using Data Simulation and Fully Convolutional Neural Networks

Søren Skovsen <sup>1,\*</sup>, Mads Dyrmann <sup>1</sup>, Anders Krogh Mortensen <sup>2</sup>, Kim Arild Steen <sup>3</sup>, Ole Green <sup>3</sup>, Jørgen Eriksen <sup>4</sup>, René Gislum <sup>2</sup>, Rasmus Nyholm Jørgensen <sup>1</sup> and Henrik Karstoft <sup>1</sup>

<sup>1</sup> Department of Engineering, Aarhus University, Finlandsgade 22, 8200 Aarhus N, Denmark; madsdyrmann@eng.au.dk (M.D.); rnj@eng.au.dk (R.N.J.); hka@eng.au.dk (H.K.)

<sup>2</sup> Department of Agroecology, Aarhus University, Forsøgsvej 1, 4200 Slagelse, Denmark; anmo@agro.au.dk (A.K.M.); rg@agro.au.dk (R.G.)

<sup>3</sup> Agro Intelligence ApS, Agro Food Park 13, 8200 Aarhus N, Denmark; kas@agointelli.com (K.A.S.); olg@agointelli.com (O.G.)

<sup>4</sup> Department of Agroecology, Aarhus University, Blichers Allé 20, 8830 Tjele, Denmark; jorgen.eriksen@agro.au.dk

\* Correspondence: ssk@eng.au.dk

Received: 31 October 2017; Accepted: 12 December 2017; Published: 17 December 2017

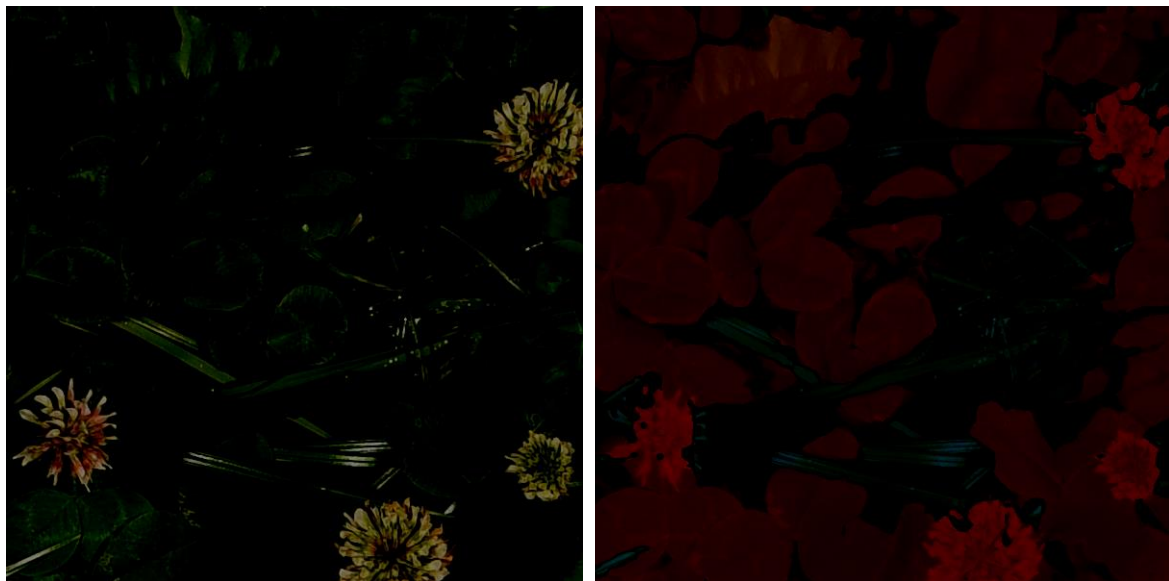

(a)

(b)

**Figure 1.** Example of the image analysis on a real image. Each element in the image is analyzed and classified as either grass (blue), clover (red), weeds (yellow) or unidentified (black overlay). (a) Example input image. (b) Automatically analyzed image.
